# Supplementary material
Source: PubMed Central journal article supplement (PMC7212056)
Supplement: EMS85521-supplement-Supplementary_Information.pdf [file EMS85521-supplement-Supplementary_Information.pdf]

## Supplementary Information

### Dairy pastoralism sustained Eastern Eurasian steppe populations for 5000 years

Shevan Wilkin<sup>\*1</sup>, Alicia Ventresca Miller<sup>1,2</sup>, William T.T. Taylor<sup>1,3</sup>, Bryan K. Miller<sup>1,4</sup>, Richard W. Hagan<sup>5</sup>, Madeleine Bleasdale<sup>1</sup>, Ashley Scott<sup>5</sup>, Sumiya Gankhuyg<sup>6</sup>, Abigail Ramsøe<sup>7,8</sup>, S. Ulziibayar<sup>9</sup>, Christian Trachsel<sup>10</sup>, Paolo Nanni<sup>10</sup>, Jonas Grossmann<sup>10</sup>, Ludovic Orlando<sup>11,12</sup>, Mark Horton<sup>1,13</sup>, Philipp W. Stockhammer<sup>5,14</sup>, Erdene Myagmar<sup>6</sup>, Nicole Boivin<sup>1,15,16,17</sup>, Christina Warinner<sup>5,18,19</sup>,  
Jessica Hendy<sup>1,5,7</sup>

1. Department of Archaeology, Max Planck Institute for the Science of Human History, Jena, 07745, Germany
2. University of Michigan, Department of Anthropology, Ann Arbor, Michigan, 48109, USA
3. University of Colorado, Department of Anthropology, Museum of Natural History, Boulder, CO, 80309-0233, USA
4. University of Oxford, Faculty of History, Oxford, OX1 2BE, UK
5. Department of Archaeogenetics, Max Planck Institute for the Science of Human History, Jena, 07745, Germany
6. Anthropology and Archaeology Department, National University of Mongolia, Ulaanbaatar, 14201, Mongolia
7. BioArCh, Department of Archaeology, University of York, York, YO10 5NG, UK.
8. Department of Earth Sciences, Natural History Museum, London, SW7 5BD, UK
9. Institute of Archaeology and Ethnology, Mongolian Academy of Sciences, Jukoviin orgon chuloo 77, Ulaanbaatar, Mongolia
10. Functional Genomics Centre, University of Zürich/ETH, Zürich, 8057, Switzerland
11. Laboratoire d'Anthropobiologie Moléculaire et d'Imagerie de Synthèse, CNRS UMR 5288, Université de Toulouse, Université Paul Sabatier, 31000 Toulouse, France
12. Globe Institute, Faculty of Health and Medical Sciences, University of Copenhagen, 1350K Copenhagen, Denmark
13. Royal Agricultural University, Cirencester, GL7 6JS, UK.
14. Institut für Vor- und Frühgeschichtliche Archäologie und Provinzialrömische Archäologie, Ludwig-Maximilians University, Munich, 80799, Germany
15. School of Social Science, The University of Queensland, Brisbane, QLD 4072, Australia
16. Department of Anthropology and Archaeology, University of Calgary, 2500 University Dr. N.W., Calgary, AB, T2N 1N4, Canada
17. Department of Anthropology, National Museum of Natural History, Smithsonian Institution, 10th St. & Constitution Ave. NW Washington, D.C. 20560, USA
18. Institute for Evolutionary Medicine, University of Zürich, Zürich, CH-8057, Switzerland
19. Department of Anthropology, Harvard University, Cambridge, MA 02138, USA

Correspondence to: Shevan Wilkin and Jessica Hendy

email: wilkin@shh.mpg.de, jessica.hendy@york.ac.uk

Supplementary Table 1. References and archaeological site information for archaeological sites presented in Table 1.

| Archaeological site             | Reference/Information Source                                                                                                                                               |
|---------------------------------|----------------------------------------------------------------------------------------------------------------------------------------------------------------------------|
| Shatar Chuluu                   | Novgorodova, E.A. 1989 Drevniaia Mongoliia. Nekotorye problemy khronologii i etnokul'turnoi istorii. Moscow                                                                |
| Khundii Gobi                    | Excavated by Kovalev and Erdenebaatar, International Central Asian Archaeological Expedition <sup>22</sup>                                                                 |
| Yagshiin Huduu                  | Excavated by Kovalev and Erdenebaatar, International Central Asian Archaeological Expedition <sup>22</sup>                                                                 |
| Ulaanzuukh                      | Excavated by Tumen, Khatanbaatar, and Erdene <sup>3</sup>                                                                                                                  |
| Uliastai River, Central Terrace | Excavated by D. Erdenebaatar, 2005, Mongolian Archaeological Expedition of Central Asian Mongolia. National University of Mongolia samples records                         |
| Berkh Uul                       | Excavated by Munkhbayar in 2012, north of Berkh Mountain. National University of Mongolia sample records                                                                   |
| Shunkhlai Uul                   | Excavated by Tumen, Navaan, and Volkov in 1979                                                                                                                             |
| Khoit Tsenkher                  | Excavated by D. Navaan, and Lhagvasuren in 1987. Khovd Mankhan. National University of Mongolia sample records                                                             |
| Chandman Uul                    | Excavated by D. Navan, National University of Mongolia sample records                                                                                                      |
| Dartsagt                        | Excavated by M. Erdene, and D. Navaan in 2008, as part of the AA-I expedition in Ulaanbaatar, Khan-Uul District, Songino Khaikhan Mountain                                 |
| Tamiryn Ulaan Khoshuu           | Khatanbaatar, D. (2007). Tamiryn Ulaan Khoshuun dakh' khunnugiin ued kholbogdoh buleg orshuulga. Mongolian Journal of Anthropology, Archaeology, and Ethnology, 3, 156–168 |
| Duulaga Uul                     | Excavated by D. Navaan in 2004. National University of Mongolia sample records                                                                                             |
| Uliastain dood denj             | Excavate by D. Erdenbaatar, Mongolian Archaeological Expedition of Central Asian Mongolia                                                                                  |
| Sharga Uul                      | Excavated in 2006 by Z. Batsaikhan. National University of Mongolia sample records;                                                                                        |
| Del Khad                        | Excavated by D. Navaan, M. Erdene, and C. Vanchigdash in 2008. National University of Mongolia sample records                                                              |
| Zaraa Tolgoi                    | Excavated by D. Navaan in 1980. National University of Mongolia sample records                                                                                             |
| Banzart Khaikhan                | Excavated in 2010 during Umengobi Expedition. National University of Mongolia sample records                                                                               |
| Tahiltyn Khotgot                | Excavated by the NUM School of Anthropology and Archaeology Summer Practice. National University of Mongolia sample records                                                |
| Burgaldain Khundii              | Excavated by Z. Batsaikhan, and S. Ulzibayar AA course II, 2005. National University of Mongolia sample records;                                                           |
| Ganzagad                        | Excavated 2010, Umungobi, South Gobi. National University of Mongolia sample records;                                                                                      |

|                                |                                                                                                                         |
|--------------------------------|-------------------------------------------------------------------------------------------------------------------------|
| Uguumur Tsuvaraa Uul           | Excavated by NUM Anthrpology and Archaeology II and III Summer Practice. National University of Mongolia sample records |
| Khoit Tsenkher, Tarvagatain Am | Excavated by D. Navaan, and Lhagvasuren in 1987. Khovd Mankhan. National University of Mongolia sample records          |
| Kharkhorin                     | Excavated in 1979, at Kharkhorin, by Ser-Odjab, Bayar, and Tumen. National University of Mongolia sample records        |
| Mori Baridag                   | Excavated by S. Ulziibayar in 2009 on the Northern Mongolian Expedition.                                                |

Supplementary Table 2. Deamidation results for dairy peptides, showing the sample identification, time period of individual, number of overall milk protein peptides, and the percentage milk peptides with deamidated asparagine (N) and glutamine (Q) residues.

| Individual | Time Period  | Peptide Count | % N Deamidation | %Q Deamidation |
|------------|--------------|---------------|-----------------|----------------|
| AT-628     | Early Bronze | 18            | 50.3            | 24.3           |
| AT-590b    | Early Bronze | 13            | 40.8            | 23.4           |
| AT-26      | Early Bronze | 2             | 66.8            | No Qs          |
| AT-233     | Late Bronze  | 126           | 32.9            | 13.5           |
| AT-835     | Mongol       | 28            | 48.3            | 3.3            |
